# Supplementary material for: Effect of bovine serum albumin (BSA) variants on the photophysical and biological properties of a NIR-responsive BSA–indocyanine green complex
Source: Royal Society of Chemistry journal article supplement (doi:10.1039/d5ma00066a), 2025-01-01
Supplement: d5ma00066a1.pdf [file d5ma00066a1.pdf]

## Supporting Information

### **Effect of bovine serum albumin (BSA) variants on the photophysical and biological properties of NIR-responsive BSA-Indocyanine green complex**

Jayashree Roy<sup>a</sup>, Devendra Tiwari<sup>a</sup>, Sahely Saha<sup>b</sup>, Raviraj Vankayala<sup>a</sup>, Sharan Rathnam<sup>c</sup>, Abhijeet Joshi<sup>c</sup>, Indranil Banerjee<sup>\*a</sup>

<sup>a</sup> Department of Bioscience and Bioengineering, Indian Institute of Technology Jodhpur,  
Karwar 342030, India.

<sup>b</sup> Technology Innovation and Startup Center (TISC), Indian Institute of Technology Jodhpur,  
Karwar 342030, India

<sup>c</sup> Department of Biosciences and Biomedical Engineering, Indian Institute of Technology Indore,  
Khandwa Road, Indore 453552, Madya Pradesh, India.

\* Corresponding Author. Phone: +91-7425037035. E-mail: [indranil@iitj.ac.in](mailto:indranil@iitj.ac.in)

| S.No. | Company Name                 | Web Resources Link                                                                                                                                                                                                                                                                                                                                                |
|-------|------------------------------|-------------------------------------------------------------------------------------------------------------------------------------------------------------------------------------------------------------------------------------------------------------------------------------------------------------------------------------------------------------------|
| 1     | MERCK                        | <a href="https://www.sigmaaldrich.com/IN/en/substance/bovineserumalbumin123459048468">https://www.sigmaaldrich.com/IN/en/substance/bovineserumalbumin123459048468</a>                                                                                                                                                                                             |
| 2     | Thermo Fisher Scientific Inc | <a href="http://www.thermofishersci.in/lit/FISHER%20BIOREAGENTS%20BOVINE%20SERUM%20ALBUMIN.pdf">http://www.thermofishersci.in/lit/FISHER%20BIOREAGENTS%20BOVINE%20SERUM%20ALBUMIN.pdf</a>                                                                                                                                                                         |
| 3     | Avantor                      | <a href="https://in.vwr.com/store/product/8561572/null">https://in.vwr.com/store/product/8561572/null</a>                                                                                                                                                                                                                                                         |
| 4     | SRL                          | <a href="https://www.srlchem.com/product/search/bsa">https://www.srlchem.com/product/search/bsa</a>                                                                                                                                                                                                                                                               |
| 5     | HIMEDIA                      | <a href="https://www.himedialabs.com/in/catalogsearch/result/?category_ids=&amp;q=Bovine+serum+albumin">https://www.himedialabs.com/in/catalogsearch/result/?category_ids=&amp;q=Bovine+serum+albumin</a>                                                                                                                                                         |
| 6     | Biowest                      | <a href="https://biowest.net/albumine-de-serum-bovin-bsa-lyophilise-ph-7-p6154/#:~:text=Lyophilized%20bovine%20serum%20albumin%20(BSA,a%20hydrophilic%20water%2Dsoluble%20protein.">https://biowest.net/albumine-de-serum-bovin-bsa-lyophilise-ph-7-p6154/#:~:text=Lyophilized%20bovine%20serum%20albumin%20(BSA,a%20hydrophilic%20water%2Dsoluble%20protein.</a> |
| 7     | bioWORLD                     | <a href="https://www.bio-world.com/albumins-proteins/bovine-serum-albumin-bsa-fraction-v-fine-powder-p-22070016">https://www.bio-world.com/albumins-proteins/bovine-serum-albumin-bsa-fraction-v-fine-powder-p-22070016</a>                                                                                                                                       |

**Table S1:** Table depicting the detailed list of online resources about different types of commercially available BSA.

## UV-vis-NIR spectra of BSA-ICG complexes prepared with varying concentrations of BSA

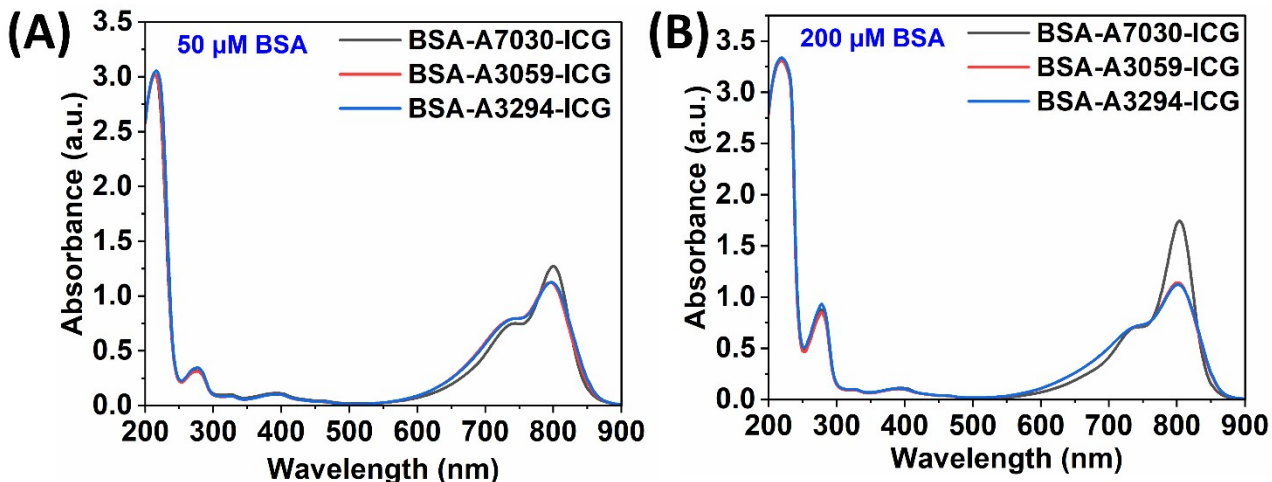

**Fig. S2:** Analysis of UV-vis-NIR spectra BSA –ICG complex prepared with varying concentrations of BSA. [A] UV-vis-NIR spectra BSA –ICG complex prepared with 50 $\mu\text{M}$  BSA and 100  $\mu\text{M}$  of ICG. [B] UV-vis-NIR spectra BSA –ICG complex prepared with 200 $\mu\text{M}$  BSA and 100  $\mu\text{M}$  of ICG. Both spectra were recorded at room temperature in an aqueous medium following the protocol mentioned in sections 2.2.1-2.2.2 of the main manuscript.

## Analysis of fluorescence emission spectra of BSA-ICG complexes prepared with varying concentrations of BSA

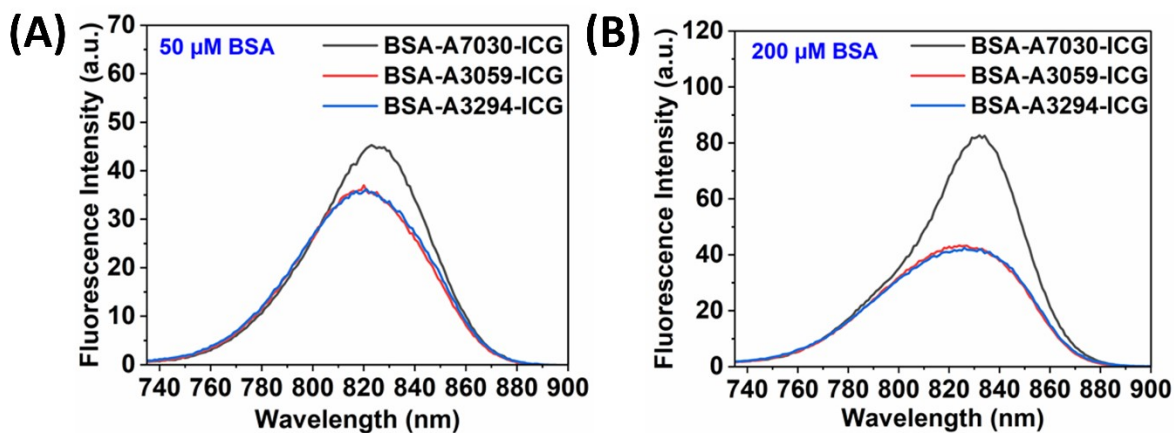

**Fig. S3:** Analysis of fluorescence emission spectra of BSA –ICG complex prepared with varying concentrations of BSA. [A] Emission spectra BSA –ICG complex prepared with 50 $\mu$ M BSA and 100  $\mu$ M of ICG. [B] Emission spectra BSA –ICG complex prepared with 200 $\mu$ M BSA and 100  $\mu$ M of ICG. Both spectra were recorded at room temperature in an aqueous medium following the protocol mentioned in section 2.2.3 of the main manuscript.

**Mapping of 3D excitation-emission (ExEm) spectra of BSA–ICG complexes prepared with varying concentrations of BSA**

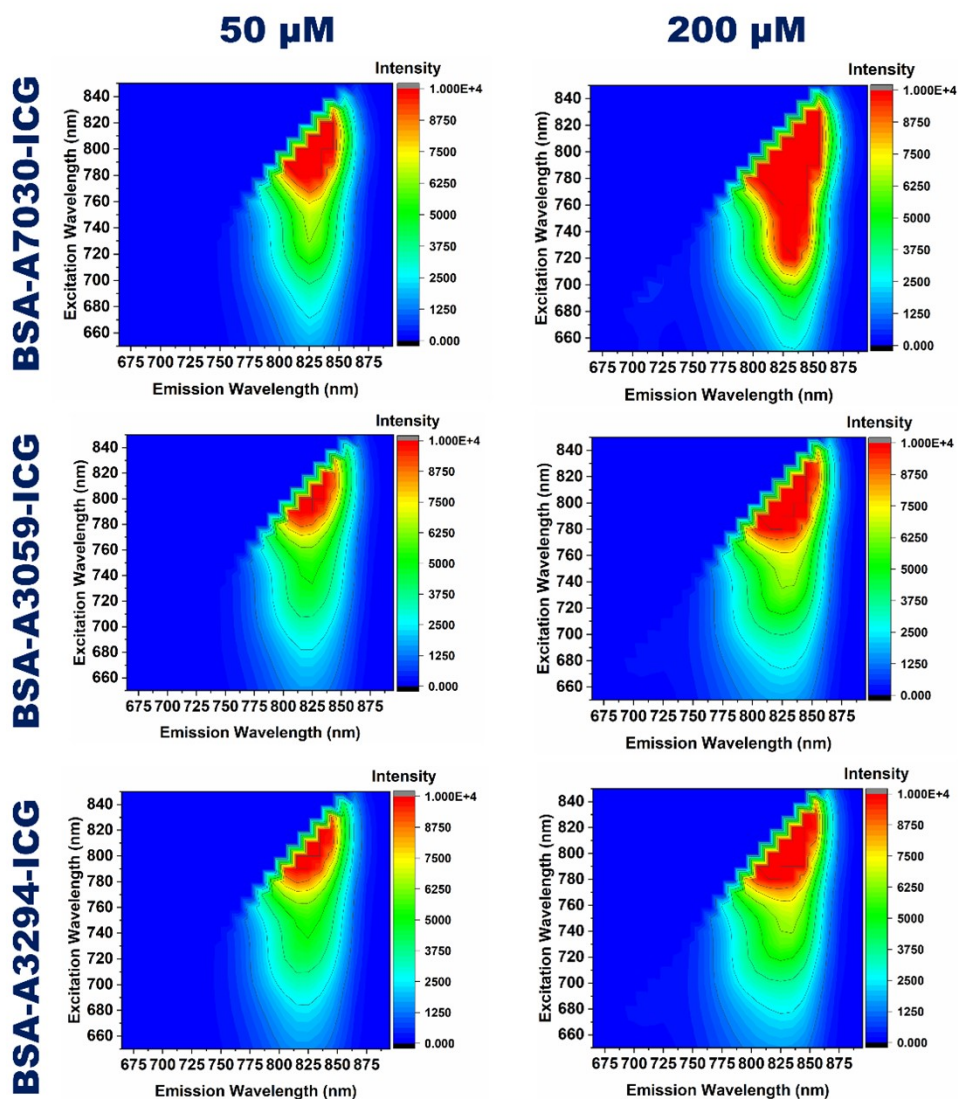

**Fig. S4:** Mapping of 3D excitation-emission (ExEm) spectra of BSA–ICG complexes prepared with varying concentrations of BSA. The spectra were recorded at room temperature in an aqueous medium following the protocol mentioned in section 2.2.3 of the main manuscript.

**Photostability of Free ICG and photo images of irradiated samples with all three BSA-ICG complexes**

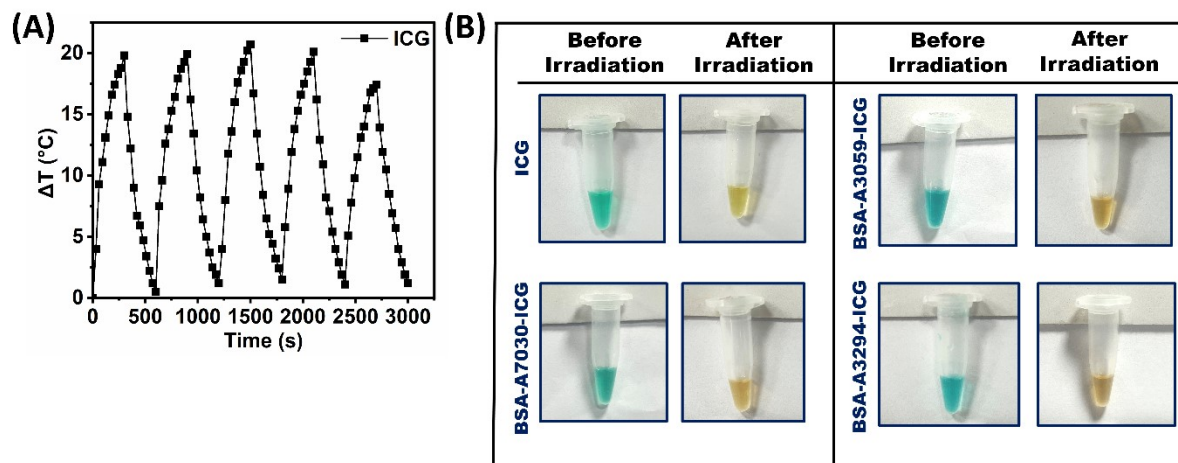

**Fig. S5:** (A) Photostability of ICG for five ON–OFF cycles; and (B) Photos showing the aqueous solution of ICG and BSA-ICG complexes after 5 on/off cycles of 808 nm laser ( $0.3 \text{ W cm}^{-2}$ ) irradiation.

**Flow cytometry analysis of cellular death in MG 63 spheroid cells after treatment with all three BSA-ICG complexes**

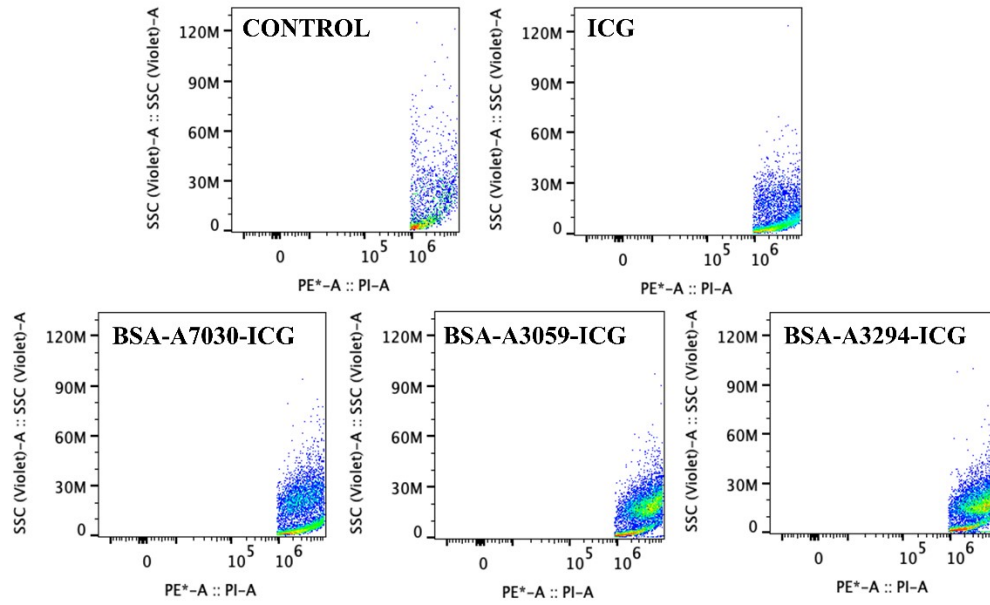

**Fig. S6:** Cellular deaths using PI staining for the treatment conditions of (i) Control, (ii) ICG, (iii) BSA-A7030-ICG, (iv) BSA-A3059-ICG, and (v) BSA-A3294-ICG in MG 63 spheroid cells
